# Supplementary material for: An augmented prescribed exercise program (APEP) to improve mobility of older acute medical patients – a randomized, controlled pilot and feasibility trial
Source: PubMed Central journal article supplement (PMC6716827; doi:10.1186/s12877-019-1246-4), 2019-08-30
Supplement: 12877_2019_1246_MOESM1_ESM.pdf [file 12877_2019_1246_MOESM1_ESM.pdf]

## Additional file 1: Floor and ceiling effects of outcome measures

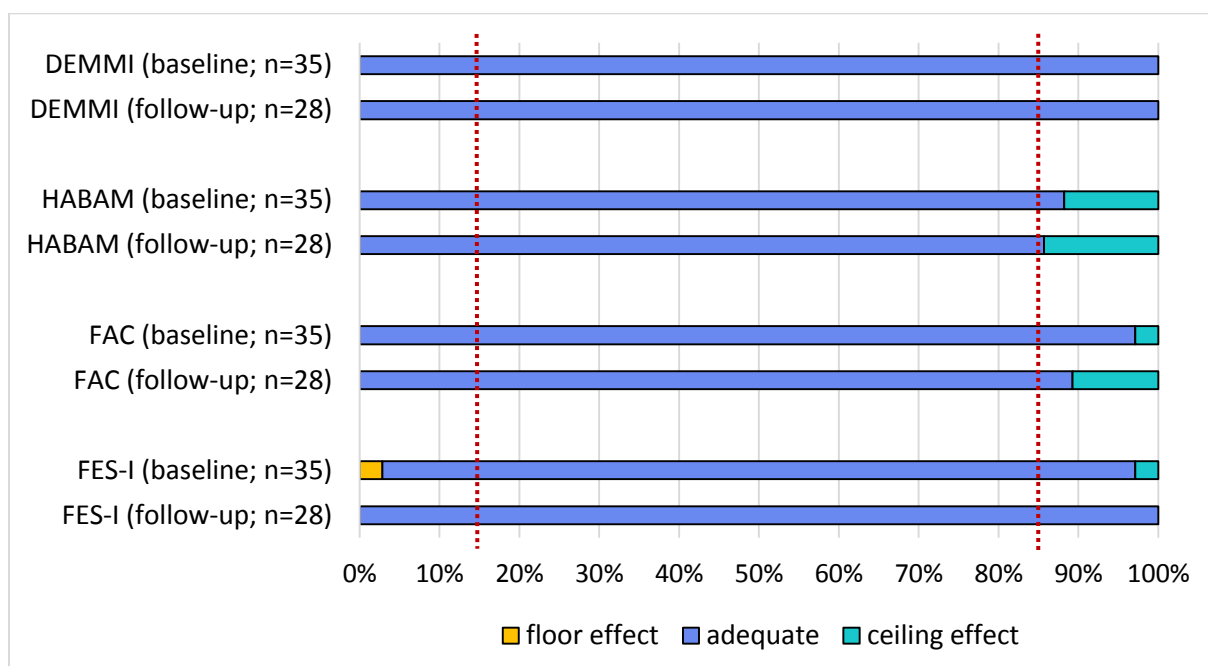

*Dotted red lines indicate the threshold for a floor or ceiling effect of  $\geq 15\%$ .*

*Abbreviations: DEMMI = de Morton Mobility Index; HABAM = Hierarchical Assessment of Balance and Mobility; FAC = Functional Ambulation Categories; FES-I = Falls Efficacy Scale – International*
