# Supplementary material for: An augmented prescribed exercise program (APEP) to improve mobility of older acute medical patients – a randomized, controlled pilot and feasibility trial
Source: PubMed Central journal article supplement (PMC6716827; doi:10.1186/s12877-019-1246-4), 2019-08-30
Supplement: 12877_2019_1246_MOESM2_ESM.pdf [file 12877_2019_1246_MOESM2_ESM.pdf]

**Additional file 2: Histogram of the duration of all 90 APEP sessions performed in the trial**

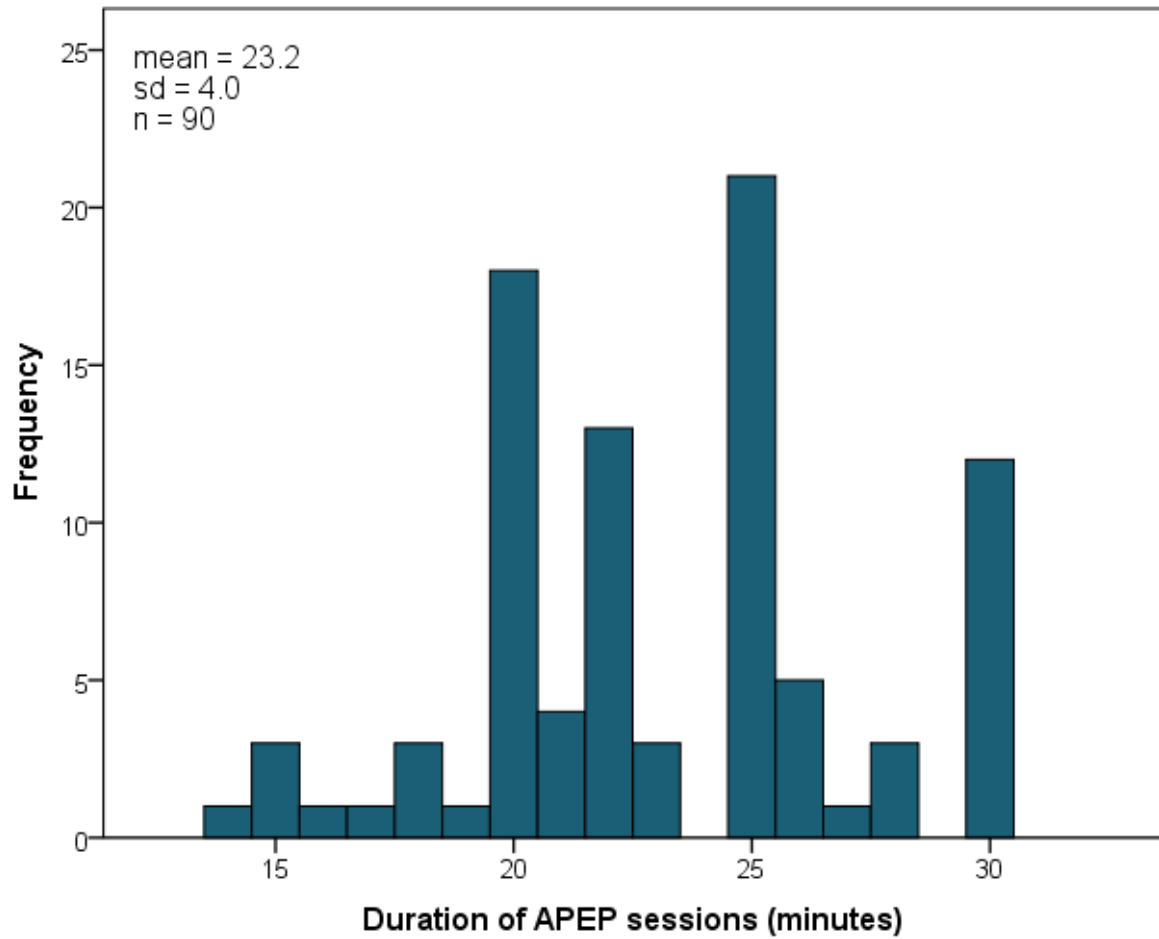

*Abbreviations: sd = standard deviation; n = number; APEP = augmented prescribed exercise program*
